# Supplementary material for: Integrative omics analysis in Pandanus odorifer (Forssk.) Kuntze reveals the role of Asparagine synthetase in salinity tolerance
Source: PubMed Central journal article supplement (PMC6353967; doi:10.1038/s41598-018-37039-y), 2019-01-30
Supplement: 41598_2018_37039_MOESM1_ESM.pdf [file 41598_2018_37039_MOESM1_ESM.pdf]

## Supplementary information

### **Integrative omics analysis in *Pandanus odorifer* (Forssk.) Kuntze reveals the role of Asparagine synthetase in salinity tolerance**

Deo Rashmi<sup>1✉</sup>, Vitthal T. Barvkar<sup>1✉ €</sup>, Altafhusain Nadaf<sup>1\*</sup>, Swapnil Mundhe<sup>2</sup> and Narendra Y. Kadoo<sup>2</sup>

1 Department of Botany, Savitribai Phule Pune University, Pune 411007, India

2 Biochemical Sciences Division, CSIR-National Chemical Laboratory, Pune 411008, India

\* Corresponding author e-mail: [abnadaf@unipune.ac.in](mailto:abnadaf@unipune.ac.in)

€ Co-corresponding author e-mail: [bvitthal@unipune.ac.in](mailto:bvitthal@unipune.ac.in)

Supplementary Information contains: Supplementary Figure, Supplementary Tables and Supplementary File

## Supplementary Figure legends:

Supplementary Figure S1: Assembled transcript length distribution of salt treated *P. odorifer*

Supplementary Figure S2: BLASTX sequence similarity distribution in salt treated *P. odorifer*.

Supplementary Figure S3: GC content distribution of assembled transcripts under control and 1 M salt treatment in *P. odorifer*.

Supplementary Figure S4: BLASTX e-Value distribution of hits generated using nr database in *P. odorifer*

Supplementary Figure S5: Top hit distribution of matched unigenes among different species generated using BLAST2GO.

Supplementary Figure S6: Gene ontology of DEGs under 1 M salt treatment in *P. odorifer*. a- Biological processes, b- Cellular components and c- Molecular functions related genes.

Supplementary Figure S7: Some of the GO terms for up-regulated transcripts in 1 M salt treated *P. odorifer*.

Supplementary Figure S8a: MS/MS spectra of Asn showing spectra of standard and pooled sample.

Supplementary Figure S8b: MS/MS spectra of ABA showing spectra of standard and pooled sample.

Supplementary Figure S8c: MS/MS spectra of Spd showing spectra of standard and pooled sample.

Supplementary Figure S8d: MS/MS spectra of  $\alpha$ KG showing spectra of standard and pooled sample.

Supplementary Figure S8e: MS/MS spectra of GABA showing spectra of standard and pooled sample.

Supplementary Figure S8f: MS/MS spectra of Gln showing spectra of standard and pooled sample.

Supplementary Figure S8g: MS/MS spectra of Glu showing spectra of standard and pooled sample.

Supplementary Figure S9: Overlaid EIC of Leu and Ile from pooled QC samples of *P. odorifer*.

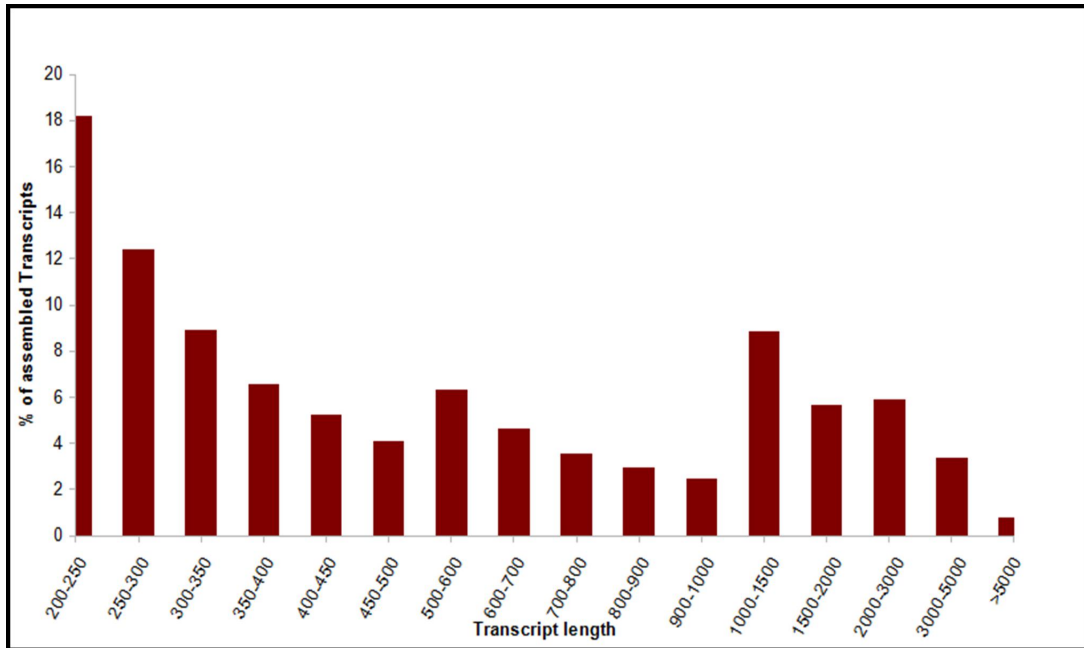

**Supplementary Fig. S1: Assembled transcript length distribution of salt treated *P. odorifer***

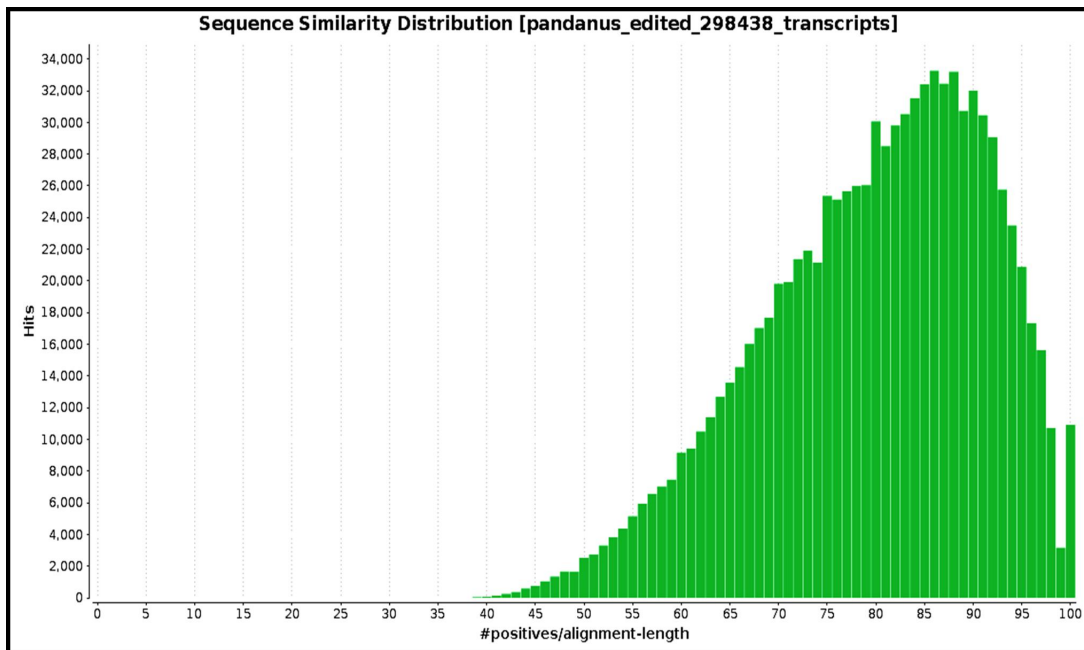

**Supplementary Fig. S2: BLASTX Sequence similarity distribution in salt treated *P. odorifer*.**

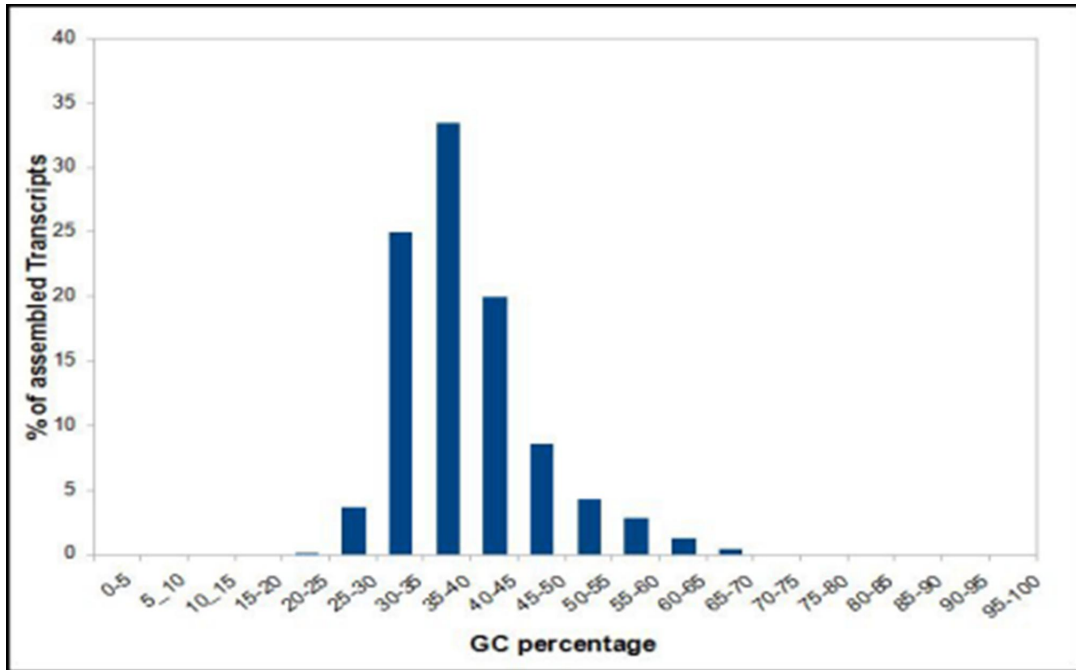

Supplementary Fig. S3: GC content distribution of assembled transcripts under control and 1 M salt treatment in *P. odorifer*.

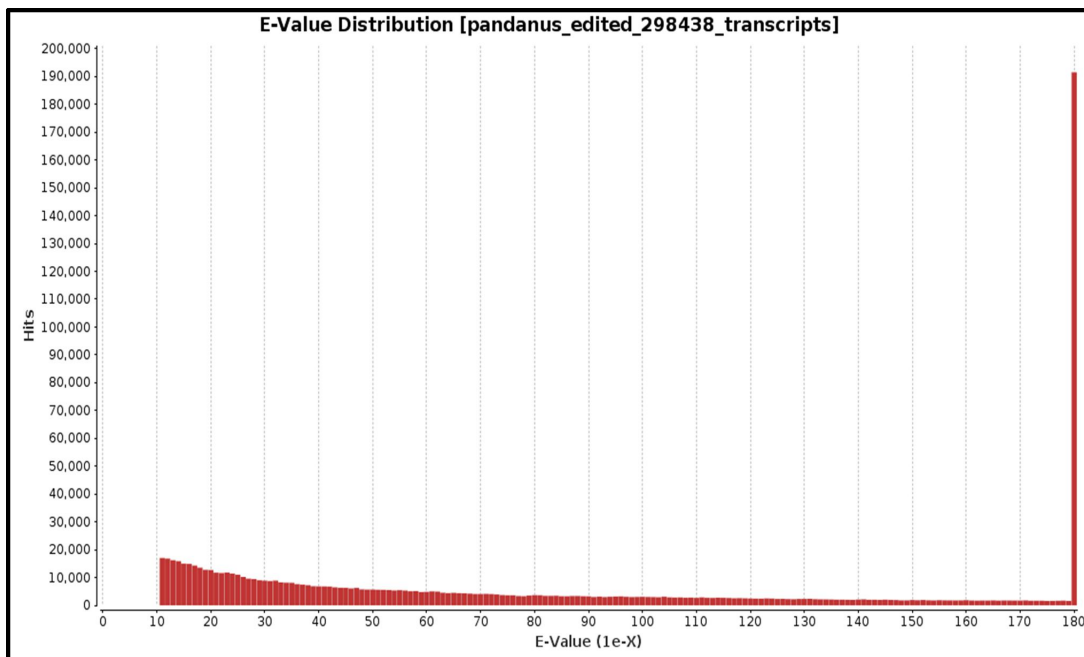

Supplementary Fig. S4: BLASTX E-Value distribution of hits generated using Nr database in *P. odorifer*

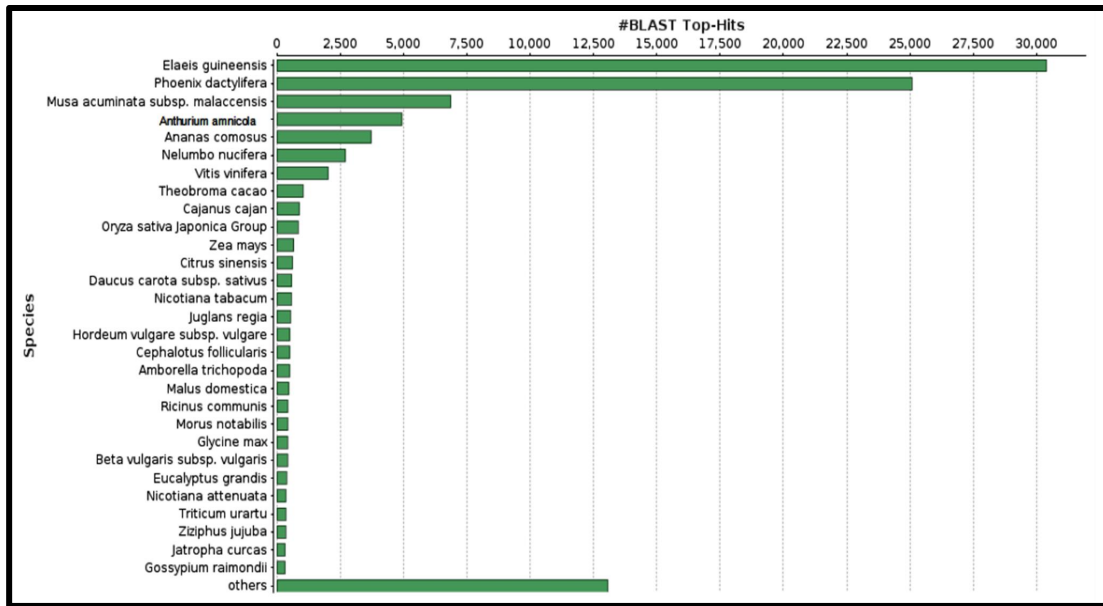

Supplementary Fig. S5: Top hit distribution of matched unigenes among different species generated using BLAST2GO.

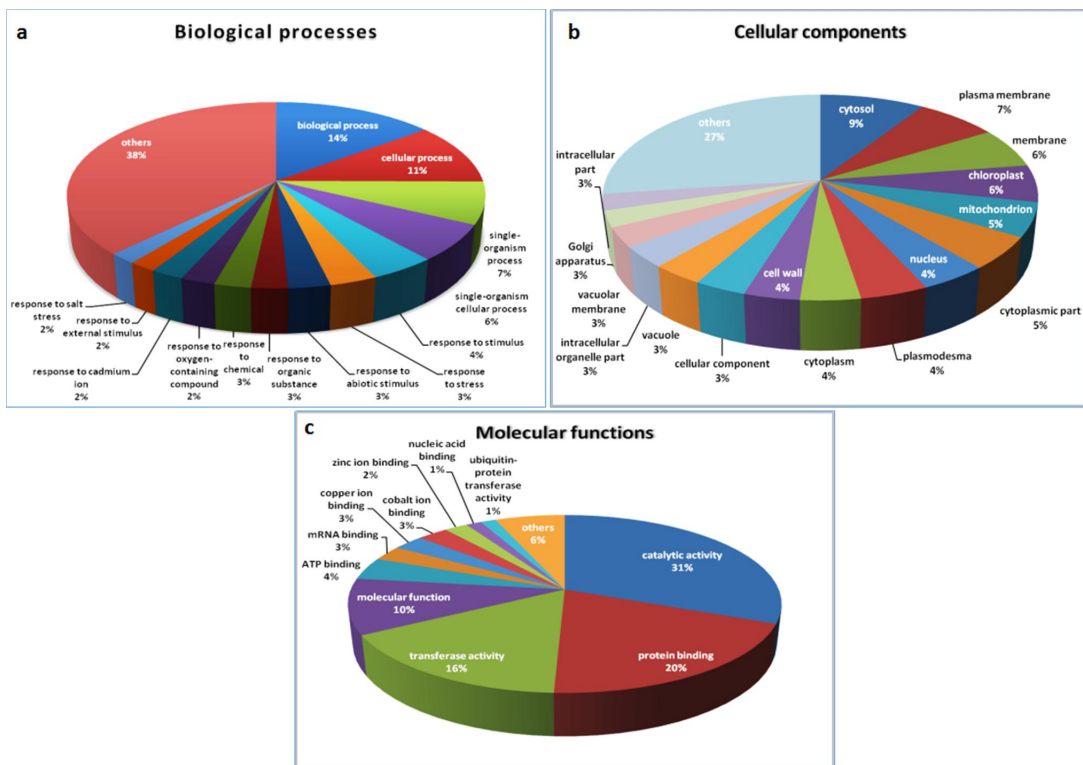

Supplementary Fig. S6: Gene ontology of DEGs under 1 M salt treatment in *P. odorifer*. a- Biological processes, b- Cellular components and c- Molecular functions related genes.

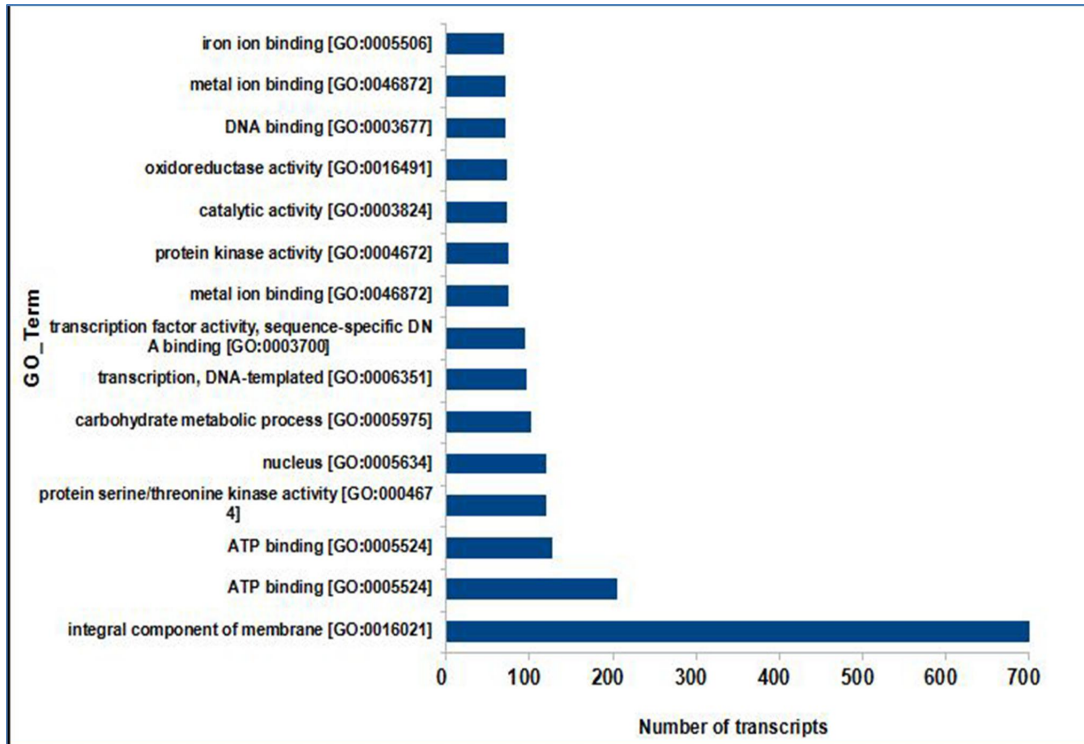

Supplementary Fig. S7: Some of the GO terms for up-regulated transcripts in 1 M salt treated *P. odorifer*.

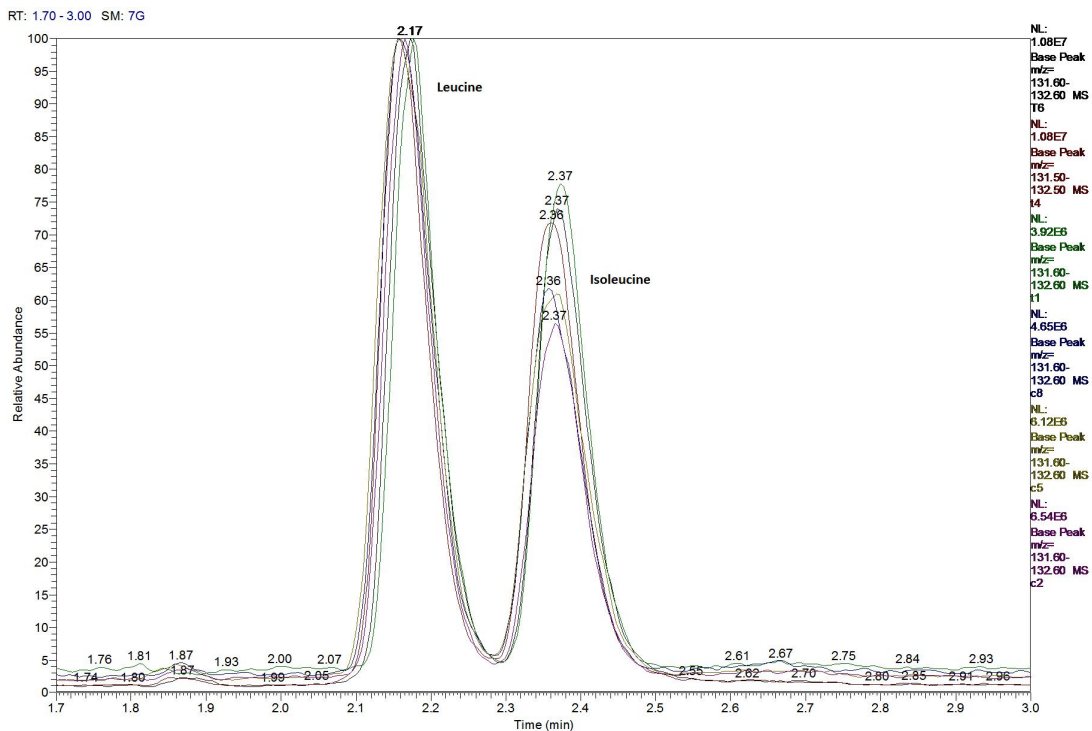

Supplementary Fig. S9: Overlaid EIC of Leu and Ile from pooled QC samples of *P. odorifer*

## List of Supplementary tables

| Supplementary Table | Sheet No. | Title                                                                                                                                                                            |
|---------------------|-----------|----------------------------------------------------------------------------------------------------------------------------------------------------------------------------------|
| Table S1            | 1         | Assembled IDs with sequence and length                                                                                                                                           |
| Table S1            | 2         | edgeR DE results for control and treatment                                                                                                                                       |
| Table S1            | 3         | KEGG pathway summary of analyzed transcript                                                                                                                                      |
| Table S2            | 1         | List of metabolites found under treatment and control upon metabolome analysis (values in C and T columns display area under peak for control and treatment, 6 replicates each). |
| Table S2            | 2         | Pooled sample MS/MS                                                                                                                                                              |
| Table S2            | 3         | Standards MS/MS                                                                                                                                                                  |
| Table S3            |           | Important features identified for PCA analysis in salt treated <i>P. odorifer</i>                                                                                                |
| Table S4            |           | Selected molecules for MS/MS analysis                                                                                                                                            |
| Table S5            |           | List of primers used in qRT-PCR of up-regulated genes under salt stress in <i>P. odorifer</i>                                                                                    |

**Supplementary Table S1:** Provided as separate excel document

**Supplementary Table S2:** Provided as separate excel document

**Supplementary Table S3:** Important features identified for PCA analysis in salt treated *P. odorifer*

| Name                    | KEGG compound | Proposed mass | Average area under peak (Control) | Average area under peak (Treatment) | Fold change (FC) |
|-------------------------|---------------|---------------|-----------------------------------|-------------------------------------|------------------|
| L-Asparagine            | C00152        | 132.0540900   | 844341.567                        | 24081761.500                        | 28.5210          |
| L-Tryptophan            | C00078        | 204.0906100   | 11824597.470                      | 100697015.000                       | 8.5159           |
| Abcisic acid            | C13546        | 250.1568415   | 398267.050                        | 2705277.183                         | 6.7926           |
| Pyruvate                | C00022        | 88.0152469    | 96624231.670                      | 14398247.500                        | 0.1490           |
| L-Arginine              | C05945        | 254.0768595   | 8136395.486                       | 49159944.370                        | 6.0420           |
| L-Tyrosine              | C00082        | 181.0746388   | 12539369.320                      | 74726468.620                        | 5.9593           |
| L-aspartate             | C00049        | 133.0375000   | 6400384.333                       | 1406408.200                         | 0.2197           |
| L-Glutamate             | C00025        | 147.0536553   | 75476502.330                      | 18425118.330                        | 0.2441           |
| Citrate                 | C00158        | 192.0266132   | 6189475.630                       | 19278360.050                        | 3.1147           |
| Oxaloacetate            | C00036        | 132.0050338   | 1143858.167                       | 3253677.000                         | 2.8445           |
| P5C                     | C03912        | 113.0478588   | 1329330.500                       | 3758383.900                         | 2.8273           |
| L-Glutamine             | C00064        | 146.0696756   | 42908013.830                      | 17095242.330                        | 0.3984           |
| $\alpha$ -Ketoglutarate | C00026        | 146.0220697   | 7398395.667                       | 12970709.870                        | 1.7532           |
| Spermidine              | C00315        | 145.1578645   | 803219.500                        | 1179153.837                         | 1.4680           |

|              |        |             |              |              |        |
|--------------|--------|-------------|--------------|--------------|--------|
| GABA         | C00334 | 103.0635417 | 18605623.830 | 21597955.170 | 1.1608 |
| L-Alanine    | C00041 | 89.0479685  | 2199471.500  | 1340349.017  | 0.6094 |
| L-Proline    | C00148 | 115.0634633 | 42003018.720 | 48450827.090 | 1.1535 |
| D-Sorbitol   | C00794 | 182.0779525 | 2686748.201  | 4517532.696  | 1.6814 |
| L-Isoleucine | C00407 | 131.0938118 | 89434.431    | 129808.687   | 1.7659 |
| L-Valine     | C00183 | 117.0790863 | 4829939.777  | 5583826.877  | 0.4363 |

**Supplementary Table S4:** Selected molecules for MS/MS analysis

| Kegg ID | Name                | Formula                                                      | Proposed mass | Calculated mass | Adduct (M+1, M-1, M+23) | ppm error | No. of fragments match | MS/MS fragments                                                                                         |
|---------|---------------------|--------------------------------------------------------------|---------------|-----------------|-------------------------|-----------|------------------------|---------------------------------------------------------------------------------------------------------|
| C00152  | L-Asparagine        | C <sub>4</sub> H <sub>8</sub> N <sub>2</sub> O <sub>3</sub>  | 132.0541      | 133.0608        | 133.0607                | 0.638     | 6                      | 70.0294, 74.0243, 87.0558, 88.0397, 116.0345, 133.0608                                                  |
| C06082  | Abscisic acid       | C <sub>15</sub> H <sub>20</sub> O <sub>4</sub> Na            | 264.1362      | 287.1254        | 287.1252                | 0.5805    | 4                      | 109.0651, 119.0859, 135.0805, 163.0754                                                                  |
| C00026  | α-Ketoglutaric acid | C <sub>5</sub> H <sub>6</sub> O <sub>5</sub>                 | 146.0221      | 145.0131        | 145.0131                | 0.0823    | 6                      | 73.0281, 99.0072, 101.0231, 102.0266, 129.0181                                                          |
| C00315  | Spermidine          | C <sub>7</sub> H <sub>19</sub> N <sub>3</sub>                | 145.1579      | 146.1652        | 146.165                 | 1.237     | 11                     | 72.0814, 73.0847, 75.0923, 84.0813, 84.0863, 112.1124, 113.0058, 129.1388, 130.1423, 146.1652, 147.1687 |
| C00334  | γ-Aminobutyric acid | C <sub>4</sub> H <sub>9</sub> NO <sub>2</sub>                | 103.0635      | 102.055         | 102.0549                | 0.9769    | 8                      | 59.0124, 740233, 74.9605, 101.0231, 102.0548, 103.0388, 103.0576, 103.919                               |
| C00041  | L-Alanine           | C <sub>3</sub> H <sub>7</sub> NO <sub>2</sub>                | 89.04797      | 90.55           | 90.0554                 | 4.4844    | 2                      | 72.04, 90.05                                                                                            |
| C00064  | L-Glutamine         | C <sub>5</sub> H <sub>10</sub> N <sub>2</sub> O <sub>3</sub> | 146.0697      | 145.0608        | 145.0608                | 0.0489    | 8                      | 84.0442, 89.0231, 102.0548, 118.9651, 127.0501, 128.0341, 145.0607, 146.0448                            |
| C00025  | L-Glutamic acid     | C <sub>5</sub> H <sub>9</sub> NO <sub>4</sub>                | 147.0537      | 146.0448        | 146.0448                | 0.2069    | 12                     | 74.0235, 82.0287, 84.0443, 85.028,                                                                      |



| Kegg ID | Name                      | Formula                                                      | Proposed mass | Calculated mass | Adduct (M+1, M-1, M+23) | ppm error | No. of fragments match | MS/MS fragments                                                                |
|---------|---------------------------|--------------------------------------------------------------|---------------|-----------------|-------------------------|-----------|------------------------|--------------------------------------------------------------------------------|
|         |                           |                                                              |               |                 |                         |           |                        | 101.0229, 102.0548, 103.0516, 103.0581, 127.0501, 128.0341, 145.0607, 146.0447 |
| C03912  | 1-Pyrroline-5-carboxylate | C <sub>5</sub> H <sub>7</sub> NO <sub>2</sub>                | 113.0479      | 114.0557        | -                       | -         | -                      | -                                                                              |
| C01044  | N-Formyl-L-aspartate      | C <sub>5</sub> H <sub>7</sub> NO <sub>5</sub>                | 161.0328      | 162.0407        | -                       | -         | -                      | -                                                                              |
| C00022  | Pyruvate                  | C <sub>3</sub> H <sub>4</sub> O <sub>3</sub>                 | 88.01523      | 87.00741        | -                       | -         | -                      | -                                                                              |
| C00036  | Oxaloacetic acid          | C <sub>4</sub> H <sub>4</sub> O <sub>5</sub>                 | 132.0050338   | 130.9972        | -                       | -         | -                      | -                                                                              |
| C00062  | L-Arginine                | C <sub>6</sub> H <sub>14</sub> N <sub>4</sub> O <sub>2</sub> | 174.1106038   | 119.0498        | -                       | -         | -                      | -                                                                              |

**Supplementary Table S5:** List of primers used in qRT-PCR of up-regulated genes under salt stress in *P. odorifer*

| Sr No. | Gene                            | Primer  | Sequence               | Amplification length (bp) | PCR efficiency (%) |
|--------|---------------------------------|---------|------------------------|---------------------------|--------------------|
| 1.     | Asparagine synthetase           | AS_FP   | CAGTTCAGTGATGGCGTTGG   | 152                       | 103.7              |
|        |                                 | AS_RP   | ACTGTTCCAGGAGGTCCAAGT  |                           |                    |
| 2.     | Glutamine synthetase            | GS_FP   | GGTATGGGATTGAGCAGGAA   | 166                       | 96.0               |
|        |                                 | GS_RP   | TCTCATTACAAGGCCTGCCT   |                           |                    |
| 3.     | Aldehyde dehydrogenase          | ALDH_FP | ACCTTGTCATGTCCATGTGG   | 157                       | 100.0              |
|        |                                 | ALDH_RP | CTCAGCGGTCTTCATGACAA   |                           |                    |
| 4.     | Glutamate dehydrogenase         | GDH_FP  | CCATATGGATTCTCCGATG    | 200                       | 102.9              |
|        |                                 | GDH_RP  | GCTTGTGGTCTTCTTGCTCC   |                           |                    |
| 5.     | Trehalose phosphate phosphatase | TPP_FP  | CTACATGGAGGCAACCGAT    | 140                       | 94.7               |
|        |                                 | TPP_RP  | GAGAATGTGCTGGCCAATGA   |                           |                    |
| 6.     | P5C synthase                    | P5CS_FP | GGGATAATGACAGTTTGGCAG  | 200                       | 100.8              |
|        |                                 | P5CS_RP | AAGAGGAGGAATGACTGCTAAA |                           |                    |
| 7.     | Spermidine synthase             | SPDS_FP | CCTGGTGGTGTCTTTGTAAC   | 139                       | 97.6               |
|        |                                 | SPDS_RP | TGTTCCCTACGTACCCTAGTG  |                           |                    |

|     |                                            |         |                         |     |        |
|-----|--------------------------------------------|---------|-------------------------|-----|--------|
| 8.  | NAC TF                                     | NAC_FP  | TACTGGAAGGCAACAGGGG     | 130 | 98.4   |
|     |                                            | NAC_RP  | CAAGACTGACTGGATCATGCA   |     |        |
| 9.  | Na <sup>+</sup> -H <sup>+</sup> antiporter | NHX1_FP | TGATTGGGGGAAGCAAGTAG    | 152 | 97.0   |
|     |                                            | NHX1_RP | TTCATCCACCGGCTCTTCTC    |     |        |
| 10. | Salt overly sensitive                      | SOS1_FP | TGCAAGTTTCTGCCATCAAGTG  | 147 | 97.9   |
|     |                                            | SOS1_RP | TGCTAAGCTGGCCAGAAAATTT  |     |        |
| 11. | Glutamate decarboxylase                    | GAD_FP  | GTGGGATCTTCAGAAGCAAT    | 170 | 101.21 |
|     |                                            | GAD_RP  | CGTAATATCCCTCTGTCAACT   |     |        |
| 12. | WRKY TF                                    | WRKY_FP | GTTCTGCAAACCCTACCG      | 104 | 93.6   |
|     |                                            | WRKY_RP | CATCCAAAACAACCAACCATGAT |     |        |
| 13. | ERF4 TF                                    | ERF4_FP | GAGGCGGACGTTCTCGG       | 143 | 93.3   |
|     |                                            | ERF4_RP | CTTATGTGGATCGCGGATCT    |     |        |
| 14. | BADH2                                      | BADH_FP | TGCTTTGAGTACTTTGCAGA    | 91  | 98.33  |
|     |                                            | BADH_RP | GAAATACATCTCAGAGAAC     |     |        |
| 15. | SSADH                                      | SSA_FP  | TTGGTGGTAAAAGGCACAG     | 113 | 100.02 |
|     |                                            | SSA_RP  | GGACGAGAAGGATCGA        |     |        |
| 16. | 5.8s rRNA                                  | 5.8s_FP | ACTCTCGGCAACGGATATCTA   | 120 | 94.23  |
|     |                                            | 5.8s_RP | CGCAACTTGCGTTCAAA       |     |        |

### Supplementary File F- R-Script used for Metabolite analysis

#

```
#These three library
library(ProbMetab)
library(xcms)
library(CAMERA)
```

```
#setting one folder inside which positive and negative subfolders should be there
```

```
xsetP <- xcmsSet("G:/Vitthal/Pandanus/pandanus_new_meta_analysis/SUBANA/POS/",
method='centWave', ppm=1, peakwidth=c(5,20),
prefilter=c(3,100),snthresh=3,integrate=1, mzdiff=0.00005,fitgauss=FALSE,
verbose.columns=TRUE)
```

```
xsetN <- xcmsSet("G:/Vitthal/Pandanus/pandanus_new_meta_analysis/SUBANA/NEG/",
method='centWave', ppm=1, peakwidth=c(5,20),
prefilter=c(3,100),snthresh=3,integrate=1, mzdiff=-0.00005,fitgauss=FALSE,
verbose.columns=TRUE)
```

```
# align retention times across samples, grouping and integration
```

```

xsetP1 <- retcor(xsetP, method='obiwarp', plottype="none", profStep=1) #positive mode
xsetPnofill <- group(xsetP1, bw=5, mzwid=0.015)
xsetP2 <- fillPeaks(xsetPnofill)

xsetN1 <- retcor(xsetN, method='obiwarp', plottype="none", profStep=1) #negative mode
xsetNnofill <- group(xsetN1, bw=5, mzwid=0.015)
xsetN2 <- fillPeaks(xsetNnofill)

#Camera step for positive and negative

an <- xsAnnotate(xsetP2)
an <- groupFWHM(an, perfwhm = 0.6)
an <- findIsotopes(an, mzabs = 0.01)
an <- groupCorr(an, cor_eic_th = 0.75)
anP <- findAdducts(an, polarity="positive")

an <- xsAnnotate(xsetN2)
an <- groupFWHM(an, perfwhm = 0.6)
an <- findIsotopes(an, mzabs = 0.01)
an <- groupCorr(an, cor_eic_th = 0.75)
anN <- findAdducts(an, polarity="negative")

#combining positive and negative mode

ionAnnotP <- get.annot(anP, allowMiss=TRUE, minint=1000)
ionAnnotN <- get.annot(anN, polarity="negative", allowMiss=TRUE, minint=1000)
comb2plus <- combineMollon(ionAnnotP, ionAnnotN)

#Database search

DB <- KEGGcpds

reactionM <- create.reactionM(DB, mollon=comb2plus, ppm.tol=10)

wl <- weightM(reactionM, useIso=FALSE)
w <- design.connection(reactionM)

# Probability calculations
x <- 1:ncol(wl$wm)
y <- 1:nrow(wl$wm)

conn <- gibbs.samp(x, y, 5000, w, wl$wm)

system.time(ansConn <- export.class.table(conn, reactionM, comb2plus, html=FALSE))

write.csv(ansConn$classTable, file="result.csv")

```
